# Supplementary material for: DCLK1 Monoclonal Antibody-Based CAR-T Cells as a Novel Treatment Strategy against Human Colorectal Cancers
Source: PubMed Central journal article supplement (PMC7016951; doi:10.3390/cancers12010054), 2019-12-23
Supplement: cancers-12-00054-s001.pdf [file cancers-12-00054-s001.pdf]

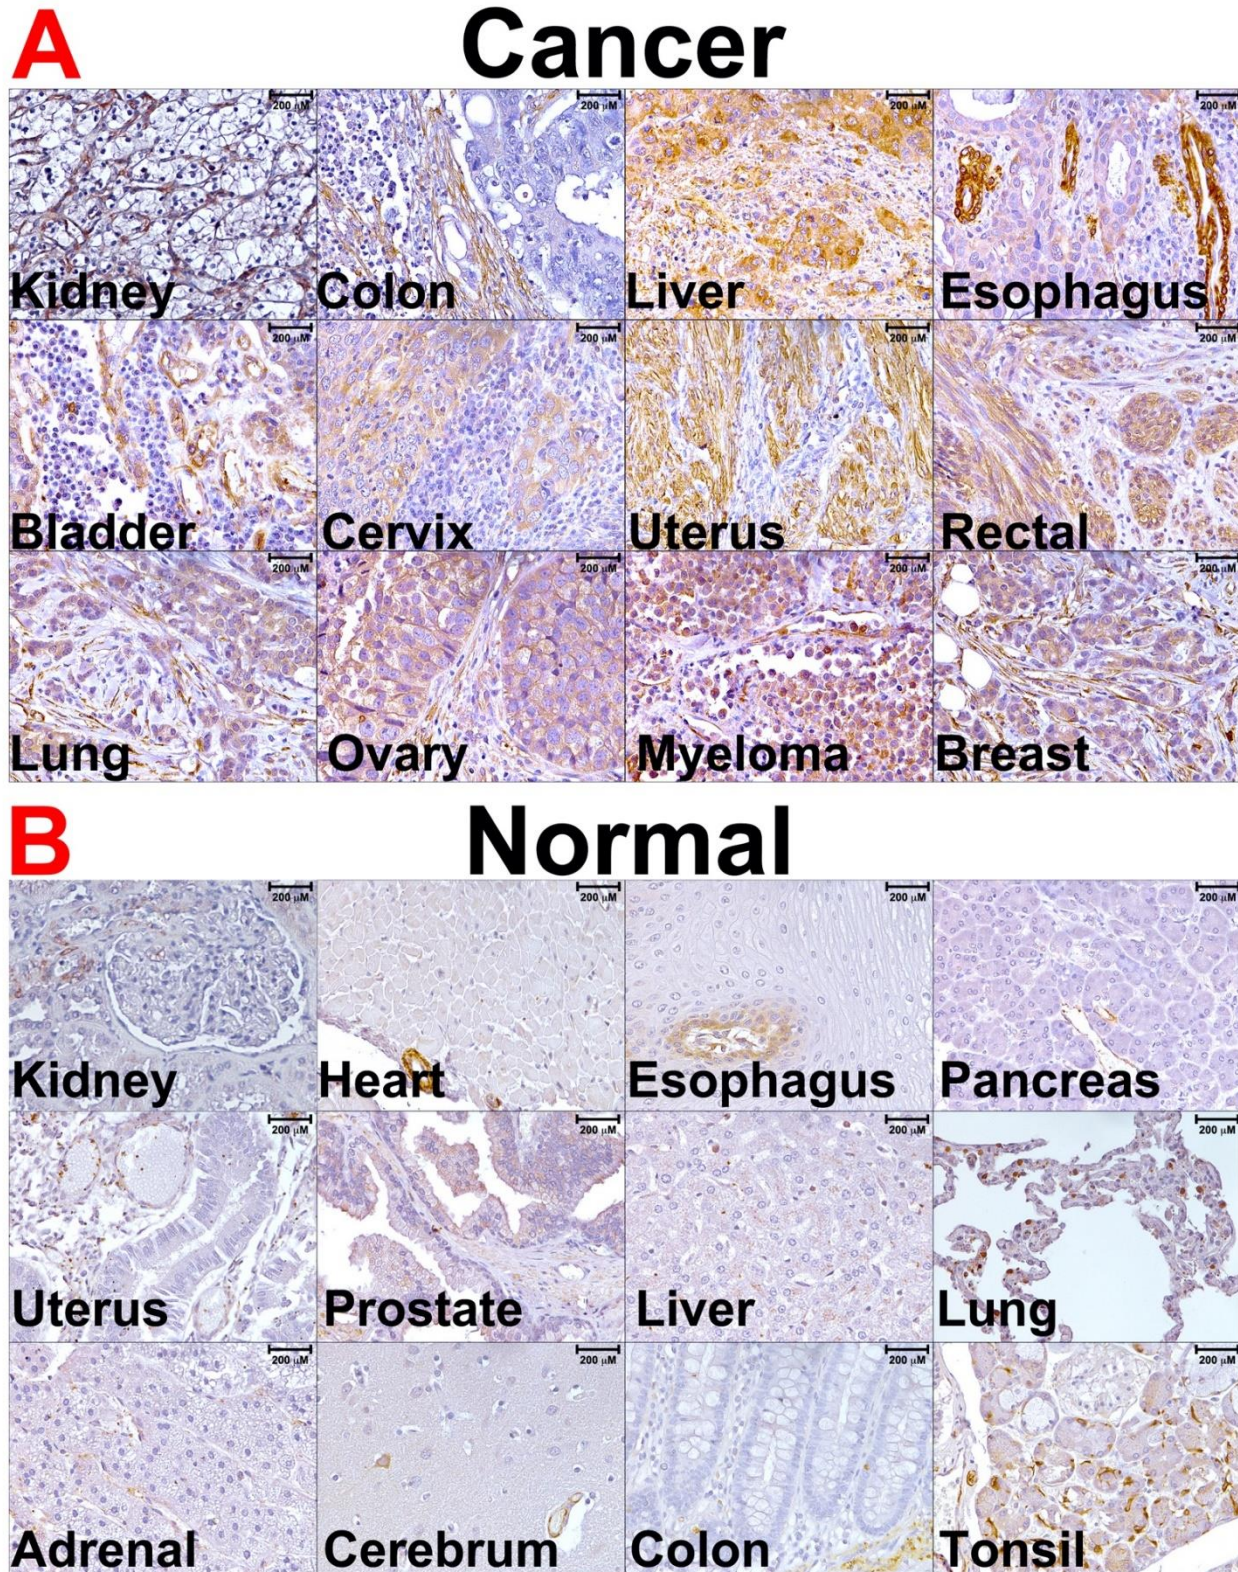

**Figure S1.** DCLK1 expression in human tissues. Human cancer tissues and normal tissues were subjected to immunohistochemical analyses for DCLK1(brown) using hCBT-15 mAb. Representative images are presented. Human cancer tissues (Kidney, CRC, Liver, Esophagus, Bladder, Cervix, Uterus, Rectal, Lung, Ovary, Melanoma, and Breast) expressed increased DCLK1 (A) compared to human normal tissues (Kidney, Heart, Esophagus, Pancreas, Uterus, Prostate, Liver, Lung, Adrenal, Cerebrum, Colon, and Tonsil) (B). Scale bars are presented at image.
